# Supplementary material
Source: ML conference proceedings conference paper supplement (https://proceedings.neurips.cc/paper_files/paper/2020/hash/76dc611d6ebaafc66cc0879c71b5db5c-Abstract.html)
Supplement: Supplementary file [file 76dc611d6ebaafc66cc0879c71b5db5c-Supplemental.pdf]

---

# Supplementary Material for Rel3D: A Minimally Contrastive Benchmark for Grounding Spatial Relations in 3D

---

Ankit Goyal<sup>†</sup>, Kaiyu Yang<sup>†</sup>, Dawei Yang<sup>†‡</sup>, Jia Deng<sup>†</sup>  
<sup>‡</sup>University of Michigan, Ann Arbor, MI  
<sup>†</sup>Princeton University, Princeton, NJ  
{agoyal, kaiyuy, dawey, jiadeng}@princeton.edu

## 1 Predicate Vocabulary

There are in total 27336 images in Rel3D. Figure. 1 plots the number of images per predicate.

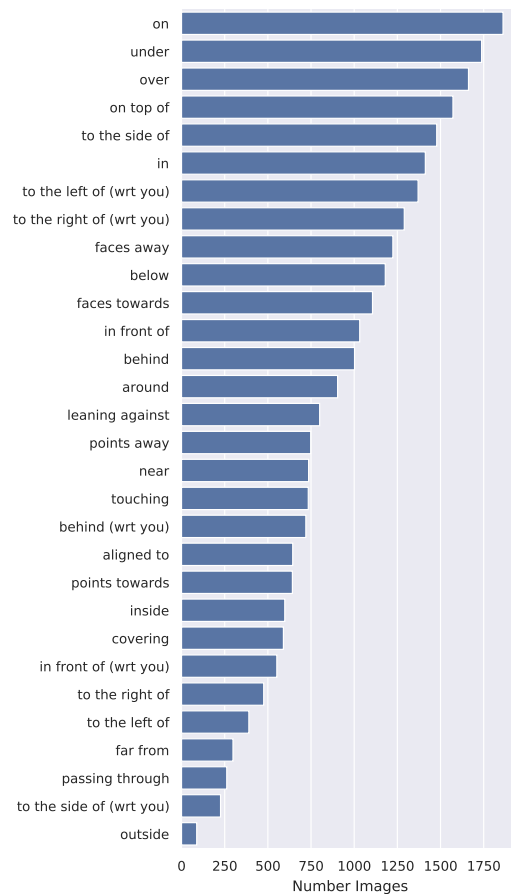

Figure 1: Number of images per predicate in Rel3D

## 2 Object Vocabulary

Table 1: Object categories in Rel3D along with their source.

| ShapeNetSem Only | YCB Only | Both in YCB and ShapeNetSem | SimpleWord |
|------------------|----------|-----------------------------|------------|
| Speaker          | Can      | Cereal Box                  | Building   |
| Computer         | Fruits   | Bottle                      | Mountain   |
| Picture Frame    | Cup      |                             | Glasses    |
| Desk             | Block    |                             | Radio      |
| TV               | Ball     |                             | Stick      |
| Mirror           |          |                             | Stone      |
| Person           |          |                             | House      |
| Picture          |          |                             | Wheel      |
| Book             |          |                             | Shoe       |
| Chair            |          |                             | Door       |
| Rug              |          |                             | Tire       |
| Bed              |          |                             | Tree       |
| Camera           |          |                             | Wall       |
| Media Storage    |          |                             | Bag        |
| Table            |          |                             |            |
| Plant            |          |                             |            |
| Gun              |          |                             |            |
| CellPhone        |          |                             |            |
| Plate            |          |                             |            |
| Cat              |          |                             |            |
| Controller       |          |                             |            |
| Knife            |          |                             |            |
| Cap              |          |                             |            |
| Animal           |          |                             |            |
| Clock            |          |                             |            |
| Ladder           |          |                             |            |
| Car              |          |                             |            |
| Washer           |          |                             |            |
| Bus              |          |                             |            |
| Boat             |          |                             |            |
| Fish             |          |                             |            |
| Ring             |          |                             |            |
| Truck            |          |                             |            |
| Bird             |          |                             |            |
| Teapot           |          |                             |            |
| Airplane         |          |                             |            |
| Bowl             |          |                             |            |
| Fork             |          |                             |            |
| Spoon            |          |                             |            |
| Couch            |          |                             |            |
| Child Bed        |          |                             |            |
| Vase             |          |                             |            |
| Toilet           |          |                             |            |
| Sink             |          |                             |            |
| Suitcase         |          |                             |            |
| Bike             |          |                             |            |

Table 2: Mapping between categories in ShapeNetSem and Rel3D. All categories in ShapeNetSem not present in Rel3D either have few shapes or have spatial relations similar to some category in Rel3D.

| ShapeNetSem Cat.                         | In Rel3D | < 5 shapes | Rel3D Cat.    | Similar Cat. in Rel3D |
|------------------------------------------|----------|------------|---------------|-----------------------|
| WallArt                                  | Yes      |            | Picture       |                       |
| Chair,Recliner                           | Yes      |            | Chair         |                       |
| Speaker                                  | Yes      |            | Speaker       |                       |
| Lamp,DeskLamp                            | No       |            |               | Plant                 |
| Chair,OfficeChair                        | Yes      |            | Chair         |                       |
| Chair,rankChairs,OfficeSideChair         | Yes      |            | Chair         |                       |
| Computer                                 | Yes      |            | Computer      |                       |
| Chair,rankChairs                         | Yes      |            | Chair         |                       |
| Table,RoundTable,AccentTable             | Yes      |            | Table         |                       |
| Picture Frame                            | Yes      |            | Picture Frame |                       |
| Couch                                    | Yes      |            | Couch         |                       |
| Candle                                   | No       |            |               | Bottle                |
| Dresser,ChestOfDrawers                   | Yes      |            | Media Storage |                       |
| Desk                                     | Yes      |            | Desk          |                       |
| Helicopter                               | Yes      |            | Airplane      |                       |
| Bottle,WineBottle                        | Yes      |            | Bottle        |                       |
| Clock,StandingClock                      | Yes      |            | Clock         |                       |
| Bench                                    | Yes      |            | Table         |                       |
| TV                                       | Yes      |            | TV            |                       |
| Mirror                                   | Yes      |            | Mirror        |                       |
| Person                                   | Yes      |            | Person        |                       |
| Picture                                  | Yes      |            | Picture       |                       |
| Bottle                                   | Yes      |            | Bottle        |                       |
| Shelves,Bookcase                         | Yes      |            | Media Storage |                       |
| TrashBin                                 | No       |            |               | Cup                   |
| Bed,LoftBed                              | No       |            | Bed           |                       |
| Books                                    | Yes      |            | Book          |                       |
| Chair,OfficeSideChair                    | Yes      |            | Chair         |                       |
| Book                                     | Yes      |            | Book          |                       |
| Chair                                    | Yes      |            | Chair         |                       |
| Lamp,FloorLamp                           | No       |            |               | Plant                 |
| Laptop,Computer                          | Yes      |            | Computer      |                       |
| FoodItem,MilkCarton                      | Yes      |            | Cereal Box    |                       |
| Oven,Counter                             | No       | Yes        |               | Washer                |
| Fireplace                                | No       |            |               |                       |
| Lamp,TableLamp                           | No       |            |               | Plant                 |
| Rug                                      | Yes      |            | Rug           |                       |
| ArcadeMachine                            | No       | Yes        |               |                       |
| Monitor                                  | Yes      |            | TV            |                       |
| LightSwitch                              | No       |            |               | Block                 |
| OutdoorTable                             | Yes      |            | Table         |                       |
| Bed                                      | Yes      |            | Bed           |                       |
| Chair,rankChairs,OfficeChair             | Yes      |            | Chair         |                       |
| Table,AccentTable                        | Yes      |            | Table         |                       |
| Camera                                   | Yes      |            | Camera        |                       |
| Media Storage                            | Yes      |            | Media Storage |                       |
| Table                                    | Yes      |            | Table         |                       |
| Plant                                    | Yes      |            | Plant         |                       |
| Gun                                      | Yes      |            | Gun           |                       |
| Dresser,ChestOfDrawers,DresserWithMirror | Yes      |            | Media Storage |                       |
| Child Bed                                | Yes      |            | Child Bed     |                       |
| Cabinet                                  | Yes      |            | Media Storage |                       |
| Vase                                     | Yes      |            | Vase          |                       |
| Cabinet,Sideboard                        | Yes      |            | Media Storage |                       |
| Chair,Recliner,rankChairs                | Yes      |            | Chair         |                       |

|                                         |     |     |               |         |
|-----------------------------------------|-----|-----|---------------|---------|
| Lamp,WallLamp                           | No  |     |               | Plant   |
| TvStand,Media Storage                   | Yes |     | Media Storage |         |
| Window                                  | No  |     |               | Picture |
| Stapler                                 | No  |     |               | Block   |
| Microwave                               | No  |     |               | Washer  |
| Violin                                  | No  |     |               | Knife   |
| TvStand,MediaStorage                    | Yes |     | Media Storage |         |
| Table,DiningTable                       | Yes |     | Table         |         |
| Table,RoundTable                        | Yes |     | Table         |         |
| CellPhone                               | Yes |     | CellPhone     |         |
| Chair,SideChair                         | Yes |     | Chair         |         |
| Plate                                   | Yes |     | Plate         |         |
| Teapot                                  | Yes |     | Teapot        |         |
| Cat                                     | Yes |     | Cat           |         |
| Lamp,CeilingLamp                        | No  |     |               | Plant   |
| Controller                              | Yes |     | Controller    |         |
| Armoire,ChestOfDrawers                  | Yes |     | Media Storage |         |
| Chair,ChairWithOttoman                  | Yes |     | Chair         |         |
| Lamp,LampPost                           | No  |     |               | Plant   |
| Armoire,Dresser,Wardrobe,ChestOfDrawers | Yes |     | Media Storage |         |
| Armoire,Wardrobe,ChestOfDrawers         | Yes |     | Media Storage |         |
| Picture Frame                           | Yes |     | Picture Frame |         |
| Bookcase                                | Yes |     | Media Storage |         |
| Oven                                    | No  |     |               | Washer  |
| Refrigerator                            | No  |     |               | Washer  |
| Table,EndTable                          | Yes |     | Table         |         |
| Table,RoundTable,DiningTable            | Yes |     | Table         |         |
| Lamp,DeskLamp,FloorLamp                 | No  |     |               | Plant   |
| Piano                                   | No  |     |               | Table   |
| Bathtub                                 | No  | Yes |               |         |
| Stool                                   | Yes |     | Table         |         |
| Whiteboard                              | No  |     | Picture       |         |
| Knife                                   | Yes |     | Knife         |         |
| Lamp                                    | No  |     |               | Plant   |
| Donut,FoodItem                          | No  |     |               | Ring    |
| Cap                                     | Yes |     | Cap           |         |
| GameTable                               | Yes |     | Table         |         |
| Chair,Couch                             | Yes |     | Chair         |         |
| ChestOfDrawers                          | Yes |     | Media Storage |         |
| Table,EndTable,RoundTable               | Yes |     | Table         |         |
| Table,CoffeeTable                       | Yes |     | Table         |         |
| MediaPlayer                             | No  |     |               | Washer  |
| MousePad                                | No  | Yes |               |         |
| Animal                                  | Yes |     | Animal        |         |
| Picture,Painting                        | Yes |     | Picture       |         |
| Airplane                                | Yes |     | Airplane      |         |
| Toilet                                  | Yes |     | Toilet        |         |
| Chair,AccentChair                       | Yes |     | Chair         |         |
| FoodItem                                | No  | Yes |               |         |
| Computer                                | Yes |     | Computer      |         |
| Printer                                 | No  |     |               | Washer  |
| DartBoard                               | No  |     |               | WallArt |
| Curtain                                 | No  |     |               | Door    |
| Booth                                   | No  | Yes |               |         |
| SpaceShip                               | Yes |     | Airplane      |         |
| Horse                                   | Yes |     | Animal        |         |

|                                |     |     |               |                   |
|--------------------------------|-----|-----|---------------|-------------------|
| Nightstand,ChestOfDrawers      | Yes |     | Media Storage |                   |
| Tank                           | No  |     |               | Truck             |
| FileCabinet                    | Yes |     | Media Storage |                   |
| Bed,PosterBed                  | Yes |     | Bed           |                   |
| Cabinet,CurioCabinet           | Yes |     | Media Storage |                   |
| Table,RoundTable,CoffeeTable   | Yes |     | Table         |                   |
| Sink                           | Yes |     | Sink          |                   |
| Ipod                           | Yes |     | CellPhone     |                   |
| Bed,SingleBed                  | Yes |     | Bed           |                   |
| Animal,PlushToy                | Yes |     | Animal        |                   |
| ToyFigure                      | No  |     |               | Block, Person     |
| Bed,KingBed                    | Yes |     | Bed           |                   |
| TvStand                        | No  | Yes |               |                   |
| Notepad                        | Yes |     | Book          |                   |
| Dryer                          | Yes |     | Washer        |                   |
| WallArt,Painting               | Yes |     | Picture       |                   |
| Bottle,BeerBottle              | Yes |     | Bottle        |                   |
| NintendoDS,VideoGameController | Yes |     | Controller    |                   |
| BarTable                       | Yes |     | Table         |                   |
| Bowl                           | Yes |     | Bowl          |                   |
| Chair,Chaise,rankChairs        | Yes |     | Chair         |                   |
| Clock                          | Yes |     | Clock         |                   |
| Stool,Barstool                 | Yes |     | Table         |                   |
| Toy                            | No  | Yes |               |                   |
| Clock,WallClock                | Yes |     | Clock         |                   |
| Rock                           | Yes |     | Stone         |                   |
| Bottle,DrinkBottle             | Yes |     | Bottle        |                   |
| Dart                           | No  | Yes |               |                   |
| Fork                           | Yes |     | Fork          |                   |
| Cabinet,FileCabinet            | No  |     | Media Storage |                   |
| CoffeeMaker                    | No  |     |               | Sink              |
| DresserWithMirror              | Yes |     | Mirror        |                   |
| Ladder                         | Yes |     | Ladder        |                   |
| Chair,Chaise                   | Yes |     | Chair         |                   |
| Poster,WallArt                 | Yes |     | Picture       |                   |
| Couch,Loveseat                 | Yes |     | Couch         |                   |
| Chair,BeanBag                  | Yes |     | Chair         |                   |
| Suitcase                       | Yes |     | Suitcase      |                   |
| Wii,VideoGameConsole           | Yes |     | Controller    |                   |
| Dog                            | Yes |     | Animal        |                   |
| PianoKeyboard                  | No  |     |               | Controller, Block |
| PSP,VideoGameController        | Yes |     | Controller    |                   |
| Snowman                        | No  | Yes |               |                   |
| Cabinet,Sideboard,CurioCabinet | No  | Yes |               |                   |
| Dishwasher                     | Yes |     | Washer        |                   |
| Spoon                          | Yes |     | Spoon         |                   |
| Horse,ToyFigure                | Yes |     | Animal        |                   |
| Radio                          | Yes |     | Radio         |                   |
| Car                            | Yes |     | Car           |                   |
| FoodItem,Cereal Box            | Yes |     | Cereal Box    |                   |
| Painting                       | Yes |     | Picture       |                   |
| Washer                         | Yes |     | Washer        |                   |
| Bus                            | Yes |     | Bus           |                   |
| Bed,DoubleBed                  | Yes |     | Bed           |                   |
| Cereal Box                     | Yes |     | Cereal Box    |                   |
| ComputerMouse                  | Yes |     |               |                   |

|                                  |     |     |               |             |
|----------------------------------|-----|-----|---------------|-------------|
| ToyFigure,SpaceShip              | No  |     |               |             |
| Bowl,FoodItem                    | No  |     | Bowl          |             |
| SodaCan                          | Yes |     | Can           |             |
| Boat                             | Yes |     | Boat          |             |
| Fish                             | Yes |     | Fish          |             |
| GameTable,RoundTable             | Yes |     | Table         |             |
| Coin                             | No  |     |               | Plate, Ring |
| Picture,WallArt,Painting         | Yes |     | Picture       |             |
| Airplane,ToyFigure,rankAirplanes | Yes |     | Airplane      |             |
| MediaDiscs                       | No  | Yes |               |             |
| Ipad                             | Yes |     | CellPhone     |             |
| Ring                             | Yes |     | Ring          |             |
| PowerSocket                      | No  | Yes |               |             |
| Ipod,Cabling                     | No  | Yes |               |             |
| _StanfordSceneDBModels           | No  |     |               |             |
| Couch,Sectional                  | Yes |     | Couch         |             |
| Backpack                         | Yes |     | Bag           |             |
| Truck                            | Yes |     | Truck         |             |
| Lamp,DeskLamp,TableLamp          | No  | Yes |               |             |
| Elephant                         | Yes |     | Animal        |             |
| Bed                              | Yes |     | Bed           |             |
| Desk,DraftingTable               | Yes |     | Desk          |             |
| Bed,RoundBed                     | Yes |     | Bed           |             |
| Pen                              | No  | Yes |               |             |
| Chair,SideChair,rankChairs       | Yes |     | Chair         |             |
| Board                            | Yes |     | Picture       |             |
| Bowl,FruitBowl                   | Yes |     | Bowl          |             |
| Keyboard                         | No  |     |               | Block, Book |
| Door                             | Yes |     | Door          |             |
| Chair,rankChairs,AccentChair     | Yes |     | Chair         |             |
| ChestOfDrawers,DresserWithMirror | Yes |     | Media Storage |             |
| Ipod,Headphones                  | No  | Yes |               |             |
| DiscCase                         | No  | Yes |               |             |
| Tank,ToyFigure                   | No  | Yes |               |             |
| Headphones                       | Yes |     |               |             |
| LDesk                            | No  |     | Desk          |             |
| Counter                          | No  |     | Table         |             |
| Nightstand                       | No  | Yes |               |             |
| Rack,Shelves,CoatRack            | Yes |     | Media Storage |             |
| Sword                            | Yes |     | Knife         |             |
| Ship                             | Yes |     | Boat          |             |
| Hanger                           | No  | Yes |               |             |
| Easel                            | No  | Yes |               |             |
| Bed,CanopyBed,PosterBed          | No  |     | Bed           |             |
| Armoire,Wardrobe                 | No  | Yes |               |             |
| Vanity                           | No  | Yes |               |             |
| SkateBoard                       | No  | Yes |               |             |
| Bird                             | Yes |     | Bird          |             |
| BedWithNightstand                | Yes |     | Bed           |             |
| Toy,Clock                        | Yes |     | Clock         |             |
| Car,ToyFigure                    | Yes |     | Car           |             |
| Cow                              | Yes |     | Animal        |             |
| Shelves                          | Yes |     | Media Storage |             |
| Camera,DSLRCamera                | Yes |     | Camera        |             |
| Bike                             | Yes |     | Bike          |             |
| Bicycle                          | Yes |     | Bike          |             |

|                                      |     |     |               |                   |
|--------------------------------------|-----|-----|---------------|-------------------|
| Thumbtack                            | No  | Yes |               |                   |
| Picture,WallArt                      | No  |     | Picture       |                   |
| Shirt                                | No  | Yes |               |                   |
| _OIMwhitelist                        | No  | Yes |               |                   |
| Rack                                 | No  | Yes |               |                   |
| Fries,FoodItem                       | No  | Yes |               |                   |
| Hat                                  | Yes |     | Cap           |                   |
| Bowl,FoodItem,FruitBowl              | Yes | Yes | Bowl          |                   |
| Armoire                              | Yes |     | Media Storage |                   |
| PowerStrip                           | No  | Yes |               |                   |
| Chair,KneelingChair                  | Yes |     | Chair         |                   |
| Harp                                 | No  | Yes |               |                   |
| Rack,Shelves                         | Yes |     | Media Storage |                   |
| Armoire,Dresser,ChestOfDrawers       | Yes |     | Media Storage |                   |
| Table,ChestOfDrawers                 | Yes |     | Table         |                   |
| Toy,Horse                            | Yes | Yes | Animal        |                   |
| Knife,Utensils                       | Yes |     | Knife         |                   |
| Ipod,CellPhone                       | Yes |     | CellPhone     |                   |
| Gamecube,VideoGameConsole            | Yes |     | Controller    |                   |
| StaplerWithStaples                   | No  | Yes |               |                   |
| Cabinet,ChestOfDrawers               | Yes |     | Media Storage |                   |
| Toy,Truck                            | Yes |     | Truck         |                   |
| Bowl,Plate                           | Yes |     | Bowl          |                   |
| Faucet                               | Yes | Yes | Sink          |                   |
| Kettle                               | Yes |     | Teapot        |                   |
| Toy,Animal,PlushToy                  | Yes |     | Animal        |                   |
| VideoGameConsole                     | Yes |     | Controller    |                   |
| Bed,Crib                             | Yes |     | Child Bed     |                   |
| ToiletPaper                          | No  |     |               |                   |
| WasherDryerSet                       | Yes |     | Washer        |                   |
| Donkey                               | Yes |     | Animal        |                   |
| TissueBox                            | No  | Yes |               |                   |
| RiceCooker                           | No  | Yes |               |                   |
| Credenza                             | No  | Yes |               |                   |
| Bed,KingBed                          | Yes |     | Bed           |                   |
| Plate,FoodItem,FoodPlate             | Yes |     | Plate         |                   |
| Poster                               | Yes |     | Picture       |                   |
| Shower                               | No  | Yes |               |                   |
| Lectern                              | No  | Yes |               |                   |
| Cassette                             | No  | Yes |               |                   |
| WallArtWithFigurine                  | Yes |     | Picture       |                   |
| Glasses                              | Yes |     | Glasses       |                   |
| TvStand,RoundTable,MediaStorage      | Yes |     | Table         |                   |
| Xbox,VideoGameConsole                | No  | Yes |               |                   |
| GuitarStand                          | No  | Yes |               |                   |
| _BAD                                 | No  | Yes |               |                   |
| Telephone                            | No  | Yes |               |                   |
| Bed,Cradle                           | Yes |     | Child Bed     |                   |
| Toy,Elephant,PlushToy,ToyFigure      | Yes |     | Animal        |                   |
| Bidet                                | No  | Yes |               |                   |
| DeskLamp                             | No  |     |               | Plant             |
| TV,TvStand                           | No  | Yes |               |                   |
| Radio,Clock                          | Yes |     | Clock         |                   |
| Bed,Dresser,DoubleBed,ChestOfDrawers | Yes |     | Bed           |                   |
| Room                                 | No  |     |               |                   |
| Calculator                           | No  |     |               | Block, Controller |

|              |    |  |          |
|--------------|----|--|----------|
| Toy,Airplane | No |  | Airplane |
|--------------|----|--|----------|

Table 3: Mapping between objects in YCB and Rel3D.

| Object ID                | Rel3D Category | Reason for not including in Rel3D |
|--------------------------|----------------|-----------------------------------|
| 001_chips_can            | Can            |                                   |
| 002_master_chef_can      | Can            |                                   |
| 003_cracker_box          | Cereal Box     |                                   |
| 004_sugar_box            | Cereal Box     |                                   |
| 005_tomato_soup_can      | Can            |                                   |
| 006_mustard_bottle       | Bottle         |                                   |
| 007_tuna_fish_can        | Can            |                                   |
| 008_pudding_box          | Cereal Box     |                                   |
| 009_gelatin_box          | Cereal Box     |                                   |
| 010_potted_meat_can      | Can            |                                   |
| 011_banana               | Fruits         |                                   |
| 012_strawberry           | Fruits         |                                   |
| 013_apple                | Fruits         |                                   |
| 014_lemon                | Fruits         |                                   |
| 015_peach                |                | Bad reconstruction                |
| 016_pear                 | Fruits         |                                   |
| 017_orange               | Fruits         |                                   |
| 018_plum                 |                | Bad reconstruction                |
| 019_pitcher_base         |                | Bad reconstruction                |
| 021_bleach_cleanser      | Bottle         |                                   |
| 022_windex_bottle        |                | Largely distorted                 |
| 023_wine_glass           |                | Missing Object                    |
| 024_bowl                 |                | Bad reconstruction                |
| 025_mug                  | Cup            |                                   |
| 026_sponge               | Block          |                                   |
| 027_skillet              |                | Bad reconstruction                |
| 028_skillet_lid          |                | Missing object                    |
| 029_plate                |                | Bad reconstruction                |
| 030_fork                 |                | Bad reconstruction                |
| 031_spoon                |                | Bad reconstruction                |
| 032_knife                |                | Bad reconstruction                |
| 033_spatula              |                | Missing object                    |
| 035_power_drill          |                | Only 1 shape                      |
| 036_wood_block           | Block          |                                   |
| 037_scissors             |                | Only 1 shape                      |
| 038_padlock              |                | Bad reconstruction                |
| 039_key                  |                | Missing object                    |
| 040_large_marker         |                | Only 1 shape                      |
| 041_small_marker         |                | Bad reconstruction                |
| 042_adjustable_wrench    |                | Bad reconstruction                |
| 043_phillips_screwdriver |                | Bad reconstruction                |
| 044_flat_screwdriver     |                | Bad reconstruction                |
| 048_hammer               |                | Only 1 shape                      |
| 049_small_clamp          |                | Missing .obj file                 |
| 050_medium_clamp         |                | Bad reconstruction                |
| 051_large_clamp          |                | Bad reconstruction                |
| 052_extra_large_clamp    |                | Only 1 Shape                      |
| 053_mini_soccer_ball     |                | Bad reconstruction                |
| 054_softball             | Ball           |                                   |
| 055_baseball             | Ball           |                                   |
| 056_tennis_ball          | Ball           |                                   |



|                           |       |                                       |
|---------------------------|-------|---------------------------------------|
| 057_racquetball           | Ball  |                                       |
| 058_golf_ball             | Ball  |                                       |
| 059_chain                 |       | Bad reconstruction                    |
| 061_foam_brick            | Block |                                       |
| 062_dice                  |       | Bad reconstruction                    |
| 063-a_marbles             |       | Bad reconstruction                    |
| 063-b_marbles             |       | Missing objects                       |
| 063-c_marbles             |       | Missing objects                       |
| 063-d_marbles             |       | Missing objects                       |
| 063-e_marbles             |       | Missing objects                       |
| 063-f_marbles             |       | Missing objects                       |
| 065-a_cups                |       | Bad reconstruction, looks like a blob |
| 065-b_cups                |       | Bad reconstruction                    |
| 065-c_cups                |       | Bad reconstruction                    |
| 065-d_cups                | Cup   |                                       |
| 065-e_cups                | Cup   |                                       |
| 065-f_cups                | Cup   |                                       |
| 065-g_cups                | Cup   |                                       |
| 065-h_cups                |       | Bad reconstruction                    |
| 065-i_cups                | Cup   |                                       |
| 065-j_cups                | Cup   |                                       |
| 070-a_colored_wood_blocks |       | Bad reconstruction                    |
| 070-b_colored_wood_blocks |       | Missing objects                       |
| 071_nine_hole_peg_test    | Block |                                       |
| 072-a_toy_airplane        |       | Small Object Part                     |
| 072-b_toy_airplane        |       | Small Object Part                     |
| 072-c_toy_airplane        |       | Small Object Part                     |
| 072-d_toy_airplane        |       | Small Object Part                     |
| 072-e_toy_airplane        |       | Small Object Part                     |
| 072-f_toy_airplane        |       | Small Object Part                     |
| 072-g_toy_airplane        |       | Small Object Part                     |
| 072-h_toy_airplane        |       | Small Object Part                     |
| 072-i_toy_airplane        |       | Small Object Part                     |
| 072-j_toy_airplane        |       | Small Object Part                     |
| 072-k_toy_airplane        |       | Small Object Part                     |
| 073-a_lego_duplo          |       | Small Object Part                     |
| 073-b_lego_duplo          |       | Small Object Part                     |
| 073-c_lego_duplo          |       | Small Object Part                     |
| 073-d_lego_duplo          |       | Small Object Part                     |
| 073-e_lego_duplo          |       | Small Object Part                     |
| 073-f_lego_duplo          |       | Small Object Part                     |
| 073-g_lego_duplo          |       | Small Object Part                     |
| 073-h_lego_duplo          |       | Small Object Part                     |
| 073-i_lego_duplo          |       | Small Object Part                     |
| 073-j_lego_duplo          |       | Small Object Part                     |
| 073-k_lego_duplo          |       | Small Object Part                     |
| 073-l_lego_duplo          |       | Small Object Part                     |
| 073-m_lego_duplo          |       | Small Object Part                     |
| 076_timer                 |       | Only 1 shape                          |
| 077_rubiks_cube           | Block |                                       |
| 078_tshirt                |       | No obj model                          |

### 3 Relation Plots

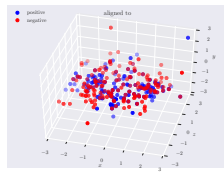

(a) aligned to

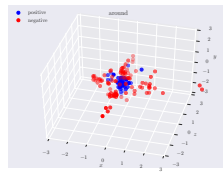

(b) around

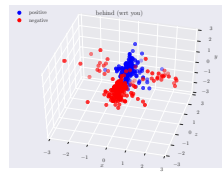

(c) behind (wrt you)

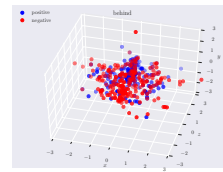

(d) behind

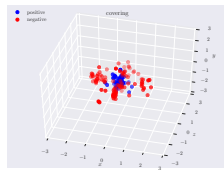

(e) covering

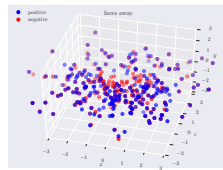

(f) faces away

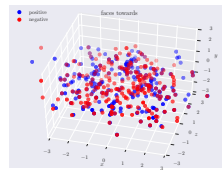

(g) faces towards

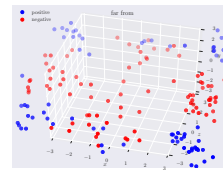

(h) far from

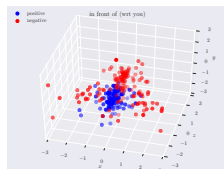

(i) in front of (wrt you)

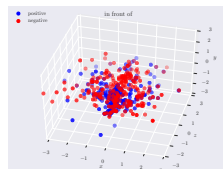

(j) in front of

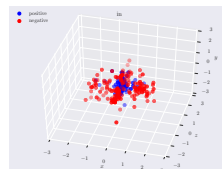

(k) in

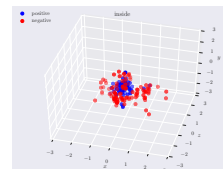

(l) inside

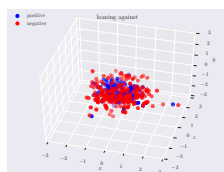

(m) leaning against

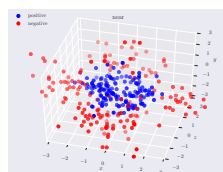

(n) near

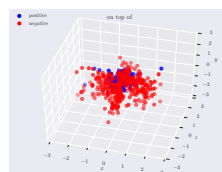

(o) on top of

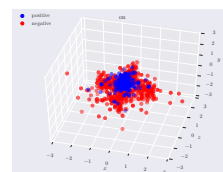

(p) on

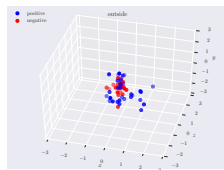

(q) outside

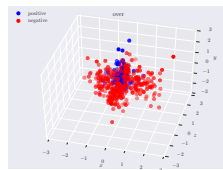

(r) over

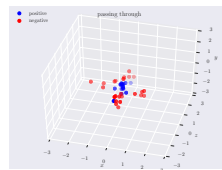

(s) passing through

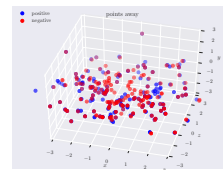

(t) points away

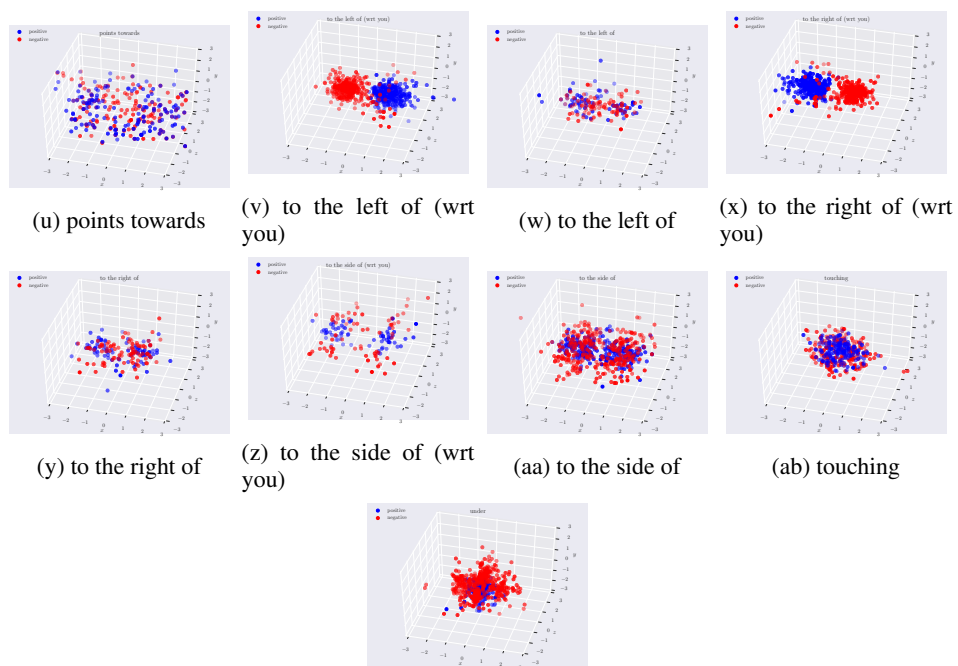

Figure 2: Each dot represents a scene in our dataset (blue means positive examples and red for negative). The location of the dot represent the relative position of the object w.r.t. to the subject in the frame of reference of the observer.

## 4 Model Hyperparameters

Table 4: All the hyper-parameters we used to tune the baseline models in Rel3D. The values in bold represent the hyperparameter choice that performed the best on the validation set.

| Model  | l2 regularization           | Feature dim                             | Roi size           | Back-bone                   |
|--------|-----------------------------|-----------------------------------------|--------------------|-----------------------------|
| 2D     | 0, <b>1e-4</b> , 1e-3       | 64, 128, <b>256</b> , 512               |                    |                             |
| VtranE | 0, 1e-6, <b>1e-4</b> , 1e-2 | 128, 256, 512, 1024, <b>2048</b> , 4096 | 1, <b>3</b> , 5    | <b>resnet18</b>             |
| VipCNN | <b>0</b> , 1e-6, 1e-4       |                                         | 3, 5, <b>7</b> , 9 | <b>resnet18</b> , resnet101 |
| DRNet  | 0, 1e-6, <b>1e-4</b> , 1e-3 | 64, <b>128</b> , 256, 512               |                    |                             |
| PPFRCN | <b>0</b> , 1e-6, 1e-4       |                                         | <b>3</b>           | <b>resnet18</b> , resnet101 |

## 5 Results Predicate-wise

| Model                  | aligned to | around | around | around (wrt y-z) | around | coverage | faces away | faces towards | far from | in    | in front of | in front of (wrt y-z) | inside | leaving against | near  | on    | on top of | outside | over  | passing through | peers away | points towards | to the left of | to the left of (wrt y-z) | to the right of | to the right of (wrt y-z) | to the side of | to the side of (wrt y-z) | touching |
|------------------------|------------|--------|--------|------------------|--------|----------|------------|---------------|----------|-------|-------------|-----------------------|--------|-----------------|-------|-------|-----------|---------|-------|-----------------|------------|----------------|----------------|--------------------------|-----------------|---------------------------|----------------|--------------------------|----------|
| 2d                     | 0.578      | 0.817  | 0.576  | 0.945            | 0.845  | 0.873    | 0.513      | 0.5           | 0.872    | 0.762 | 0.625       | 0.931                 | 0.717  | 0.757           | 0.916 | 0.845 | 0.831     | 0.667   | 0.798 | 0.67            | 0.516      | 0.551          | 0.717          | 0.948                    | 0.517           | 0.935                     | 0.661          | 0.889                    | 0.674    |
| VtranE                 | 0.612      | 0.768  | 0.53   | 0.961            | 0.818  | 0.822    | 0.526      | 0.55          | 0.723    | 0.766 | 0.578       | 0.944                 | 0.692  | 0.716           | 0.878 | 0.849 | 0.838     | 0.667   | 0.805 | 0.717           | 0.548      | 0.543          | 0.667          | 0.933                    | 0.542           | 0.952                     | 0.641          | 0.792                    | 0.667    |
| VipCNN                 | 0.647      | 0.774  | 0.606  | 0.914            | 0.75   | 0.803    | 0.545      | 0.567         | 0.872    | 0.703 | 0.602       | 0.889                 | 0.725  | 0.662           | 0.882 | 0.797 | 0.77      | 0.583   | 0.743 | 0.594           | 0.492      | 0.623          | 0.5            | 0.881                    | 0.592           | 0.917                     | 0.713          | 0.889                    | 0.727    |
| DRNet                  | 0.612      | 0.848  | 0.576  | 0.961            | 0.777  | 0.866    | 0.539      | 0.558         | 0.723    | 0.752 | 0.625       | 0.958                 | 0.75   | 0.676           | 0.849 | 0.832 | 0.858     | 0.708   | 0.775 | 0.689           | 0.5        | 0.529          | 0.6            | 0.952                    | 0.475           | 0.957                     | 0.67           | 0.875                    | 0.667    |
| PPFRCN                 | 0.647      | 0.811  | 0.606  | 0.844            | 0.777  | 0.793    | 0.513      | 0.567         | 0.83     | 0.752 | 0.633       | 0.889                 | 0.7    | 0.635           | 0.857 | 0.828 | 0.791     | 0.542   | 0.741 | 0.66            | 0.516      | 0.601          | 0.817          | 0.913                    | 0.558           | 0.939                     | 0.69           | 0.903                    | 0.667    |
| MLP (Aligned Absolute) | 0.672      | 0.945  | 0.803  | 0.977            | 0.946  | 0.904    | 0.955      | 0.783         | 0.787    | 0.841 | 0.891       | 0.944                 | 0.817  | 0.797           | 0.929 | 0.909 | 0.824     | 0.792   | 0.869 | 0.698           | 0.913      | 0.703          | 0.817          | 0.956                    | 0.808           | 0.965                     | 0.796          | 0.889                    | 0.674    |
| MLP (Raw Absolute)     | 0.672      | 0.915  | 0.682  | 0.977            | 0.946  | 0.889    | 0.818      | 0.608         | 0.862    | 0.831 | 0.742       | 0.903                 | 0.85   | 0.743           | 0.933 | 0.888 | 0.845     | 0.833   | 0.874 | 0.708           | 0.786      | 0.652          | 0.717          | 0.94                     | 0.567           | 0.987                     | 0.716          | 0.917                    | 0.659    |
| Human                  | 0.888      | 0.982  | 0.97   | 0.961            | 0.946  | 0.965    | 0.968      | 0.925         | 0.777    | 0.955 | 0.938       | 0.958                 | 0.933  | 0.932           | 0.966 | 0.983 | 0.973     | 0.75    | 0.982 | 0.972           | 0.9682     | 0.986          | 0.95           | 0.988                    | 0.958           | 0.983                     | 0.951          | 0.986                    | 0.932    |
